# Supplementary material for: Dehydration-activated structural phase transition in a two-dimensional hybrid double perovskite
Source: Royal Society of Chemistry journal article supplement (doi:10.1039/d2dt00991a), 2022-01-01
Supplement: d2dt00991a1.pdf [file d2dt00991a1.pdf]

# Dehydration-activated structural phase transition in a two-dimensional hybrid double perovskite

Rui-Ying Ren,<sup>†a</sup> Chang-Yuan Su,<sup>†\*ab</sup> Ting Shao,<sup>a</sup> Zhi-Xu Zhang,<sup>b</sup> Pei-Zhi Huang,<sup>a</sup>

Yi Zhang,<sup>b</sup> Qiang-Qiang Jia<sup>\*a</sup> and Da-Wei Fu<sup>\*a</sup>

*(a Institute for Science and Applications of Molecular Ferroelectrics, Key Laboratory of the Ministry of Education for Advanced Catalysis Materials, Zhejiang Normal University, Jinhua, 321004, People's Republic of China.*

*b Ordered Matter Science Research Center, Jiangsu Key Laboratory for Science and Applications of Molecular Ferroelectrics, Southeast University, Nanjing, 211189, People's Republic of China.)*

## Table of contents

|                                                                                                                                                                                                                                                                 |     |
|-----------------------------------------------------------------------------------------------------------------------------------------------------------------------------------------------------------------------------------------------------------------|-----|
| DSC Measurements. ....                                                                                                                                                                                                                                          | S2  |
| Single-Crystal X-ray Crystallography. ....                                                                                                                                                                                                                      | S2  |
| Powder X-Ray Diffraction. ....                                                                                                                                                                                                                                  | S2  |
| Thermogravimetric analysis. ....                                                                                                                                                                                                                                | S2  |
| Ultraviolet-visible (UV-vis) absorbance spectroscopy. ....                                                                                                                                                                                                      | S2  |
| Dielectric Measurements. ....                                                                                                                                                                                                                                   | S2  |
| Hirshfeld surfaces analysis. ....                                                                                                                                                                                                                               | S3  |
| Figure S1. Measured and simulated powder X-ray diffraction patterns of (CHA) <sub>4</sub> CuBiI <sub>8</sub> ·H <sub>2</sub> O (a) and (CHA) <sub>4</sub> CuBiI <sub>8</sub> at room temperature (b). ....                                                      | S4  |
| Figure S2. TGA curve of (CHA) <sub>4</sub> CuBiI <sub>8</sub> ·H <sub>2</sub> O (a) and (CHA) <sub>4</sub> CuBiI <sub>8</sub> (b). ....                                                                                                                         | S4  |
| Figure S3. Changes in cell parameters of (CHA) <sub>4</sub> CuBiI <sub>8</sub> ·H <sub>2</sub> O at 150 K and (CHA) <sub>4</sub> CuBiI <sub>8</sub> at 400 K and 150 K including Volume and <i>a</i> , <i>b</i> , <i>c</i> (inset). ....                        | S4  |
| Figure S4. Comparison for Hirshfeld dnorm surfaces and two-dimensional (2D) fingerprint plots of (CHA) <sub>4</sub> CuBiI <sub>8</sub> ·H <sub>2</sub> O at 150 K (a)(d), and (CHA) <sub>4</sub> CuBiI <sub>8</sub> at 400 K (b)(e) and 150 K (c)(f). ....      | S5  |
| Figure S5. The UV-vis absorption spectra of (CHA) <sub>4</sub> CuBiI <sub>8</sub> ·H <sub>2</sub> O and (CHA) <sub>4</sub> CuBiI <sub>8</sub> at room temperature. ....                                                                                         | S5  |
| Table S1. Phase transition temperature and cause of phase transition of (CHA) <sub>2</sub> CdCl <sub>4</sub> , (CHA) <sub>2</sub> PbBr <sub>4-4x</sub> I <sub>4x</sub> and (CHA) <sub>2</sub> BiCl <sub>5</sub> . ....                                          | S6  |
| Table S2. Crystal data and structure refinements for (CHA) <sub>4</sub> CuBiI <sub>8</sub> ·H <sub>2</sub> O at 150 K, and (CHA) <sub>4</sub> CuBiI <sub>8</sub> at 400 K and 150 K. ....                                                                       | S6  |
| Table S3. Selected bond lengths [Å] and bond angles [°] for (CHA) <sub>4</sub> CuBiI <sub>8</sub> ·H <sub>2</sub> O at 150 K. ....                                                                                                                              | S7  |
| Table S4. Selected bond lengths [Å] and bond angles [°] for (CHA) <sub>4</sub> CuBiI <sub>8</sub> at 400 K. ....                                                                                                                                                | S7  |
| Table S5. Selected bond lengths [Å] and bond angles [°] for (CHA) <sub>4</sub> CuBiI <sub>8</sub> at 150 K. ....                                                                                                                                                | S8  |
| Table S6. H <sub>inside</sub> -I <sub>outside</sub> surface area, mean <i>d<sub>i</sub></i> and mean <i>d<sub>e</sub></i> for (CHA) <sub>4</sub> CuBiI <sub>8</sub> ·H <sub>2</sub> O and (CHA) <sub>4</sub> CuBiI <sub>8</sub> at different temperatures. .... | S10 |

## Experimental Measurement Methods

### DSC Measurements.

DSC measurement of  $[\text{C}_6\text{H}_{14}\text{N}]_4\text{CuBiI}_8\cdot\text{H}_2\text{O}$  was executed from 303 to 473 K at a rate of  $5\text{ K min}^{-1}$  applying a PerkinElmer Diamond DSC instrument.

### Single-Crystal X-ray Crystallography.

Variable-temperature single-crystal XRD data of  $(\text{CHA})_4\text{CuBiI}_8\cdot\text{H}_2\text{O}$  and  $(\text{CHA})_4\text{CuBiI}_8$  were collected using a Bruker APEX-II CCD with  $\text{MoK}\alpha$  radiation ( $\lambda = 0.71073\text{ \AA}$ ) at 150 K, 400 K and 150 K (after cooling) whose processing was disposed by the APEX3. Variable-temperature crystal structures were solved using a direct method and subsequent continuous Fourier synthesis. Subsequently, these crystals were refined by full-matrix leastsquares methods based on F2 using the SHELXLTL software package. Eventually, in addition to the asymmetric units and packing shown in main body using DIAMOND software, other relevant crystallographic data and structure refinement are listed in Table S2 in supporting information.

Since the standard space group ( $C2/c$  No. 15) was not used in the CCDC (1903595) originally reported by Zheng et al., we re-uploaded this structure as follows: CCDC: 2167267 ( $(\text{CHA})_4\text{CuBiI}_8\cdot\text{H}_2\text{O}$  at 150 K). In addition, CCDC of  $(\text{CHA})_4\text{CuBiI}_8$  at 400 K and 150 K is 2120152 and 2120153, respectively.

### Powder X-Ray Diffraction.

Powder X-Ray diffraction (PXRD) data for  $(\text{CHA})_4\text{CuBiI}_8\cdot\text{H}_2\text{O}$  and  $(\text{CHA})_4\text{CuBiI}_8$  were measured on a D8 Advance03030502 X-ray diffractometer at room temperature. Diffraction patterns were collected in the  $2\theta$  range of  $5\text{--}55^\circ$  with a step size of  $0.02^\circ$ .

### Thermogravimetric analysis.

Thermogravimetric analysis (TGA) was executed to observe the heat stability of  $(\text{CHA})_4\text{CuBiI}_8\cdot\text{H}_2\text{O}$  and  $(\text{CHA})_4\text{CuBiI}_8$  using a TA Q50 system at a heating rate of  $10\text{ K min}^{-1}$  from room temperature to 1000 K in the atmosphere.

### Ultraviolet-visible (UV-vis) absorbance spectroscopy.

Ultraviolet-visible (UV-vis) absorbance spectroscopy was measured on polycrystalline samples by using Shimadzu (Tokyo, Japan) UV-2600 spectrophotometer at room temperature.

### **Dielectric Measurements.**

Firstly, the dry crystals  $(\text{CHA})_4\text{CuBiI}_8$  were grinded into powder, which was pressed into a sheet subsequently. Using the conductive carbon paint and wires, the thin plate was made into capacitor measured for dielectric measurements. The complex dielectric constants ( $\varepsilon = \varepsilon' - i\varepsilon''$ , where  $\varepsilon'$  is the real part, and  $\varepsilon''$  represents the imaginary parts) were measured by a TongHui TH2828A instrument with a temperature range of 300–400 K.

### **Hirshfeld surfaces analysis.**

Hirshfeld surfaces and the related 2D-fingerprint plots were calculated by using the CrystalExplorer program with inputting structure file in CIF format. In this work, all the Hirshfeld surfaces were generated using a standard (high) surface resolution. The 3D Hirshfeld surfaces and 2D fingerprint plots are unique for any crystal structure. The intensity of molecular interaction is mapped onto the Hirshfeld surface by using the respective red-blue-white scheme: where the white or green regions exactly correspond to the distance of Van der Waals contact, the blue regions correspond to longer contacts, and the red regions represent closer contacts. In 2D fingerprint plots, each point represents an individual pair ( $d_i$ ,  $d_e$ ), reflecting the distances to the nearest atom inside ( $d_i$ ) and outside ( $d_e$ ) of the Hirshfeld  $d_{\text{norm}}$  surface.

The normalized contact distance  $d_{\text{norm}}$  is based on  $d_e$ ,  $d_i$  and the van der Waals (vdW) radii of the two atoms external ( $r_e^{\text{vdW}}$ ) and internal ( $r_i^{\text{vdW}}$ ) to the surface:

$$d_{\text{norm}} = \frac{d_i - r_i^{\text{vdW}}}{r_i^{\text{vdW}}} + \frac{d_e - r_e^{\text{vdW}}}{r_e^{\text{vdW}}}$$

$d_{\text{norm}}$  surface is used for the identification of close intermolecular interactions.

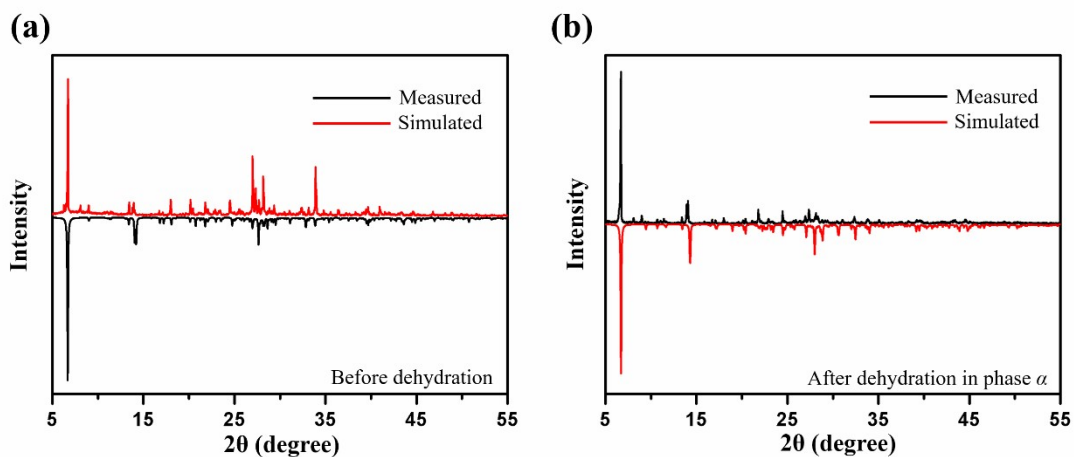

**Figure S1.** Measured and simulated powder X-ray diffraction patterns of  $(\text{CHA})_4\text{CuBi}_8 \cdot \text{H}_2\text{O}$  (a) and  $(\text{CHA})_4\text{CuBi}_8$  at room temperature (b).

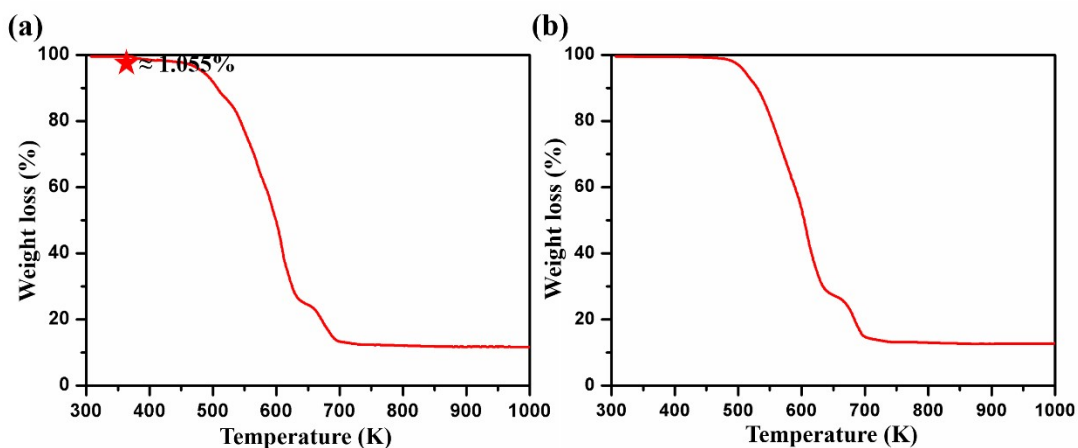

**Figure S2.** TGA curve of  $(\text{CHA})_4\text{CuBi}_8 \cdot \text{H}_2\text{O}$  (a) and  $(\text{CHA})_4\text{CuBi}_8$  (b).

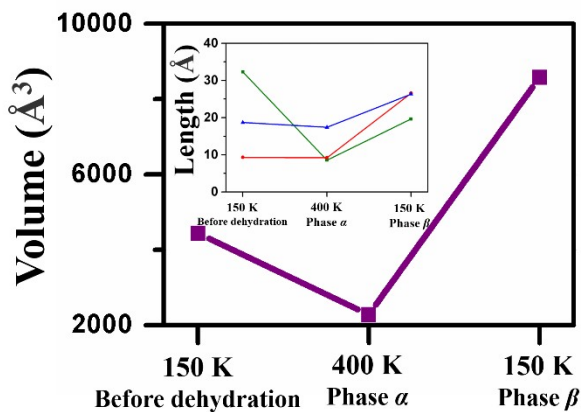

**Figure S3.** Changes in cell parameters of  $(\text{CHA})_4\text{CuBi}_8 \cdot \text{H}_2\text{O}$  at 150 K and  $(\text{CHA})_4\text{CuBi}_8$  at 400 K and 150 K including Volume and  $a$ ,  $b$ ,  $c$  (inset).

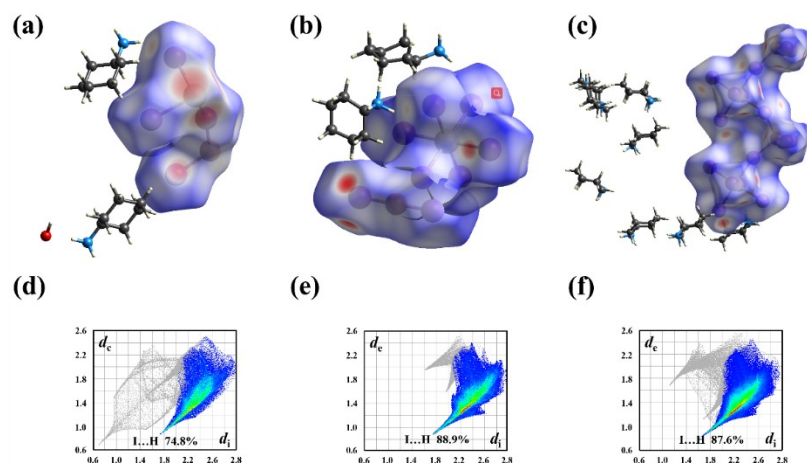

**Figure S4.** Comparison for Hirshfeld dnorm surfaces and two-dimensional (2D) fingerprint plots of (CHA)<sub>4</sub>CuBiI<sub>8</sub>·H<sub>2</sub>O at 150 K (a)(d), and (CHA)<sub>4</sub>CuBiI<sub>8</sub> at 400 K (b)(e) and 150 K (c)(f).

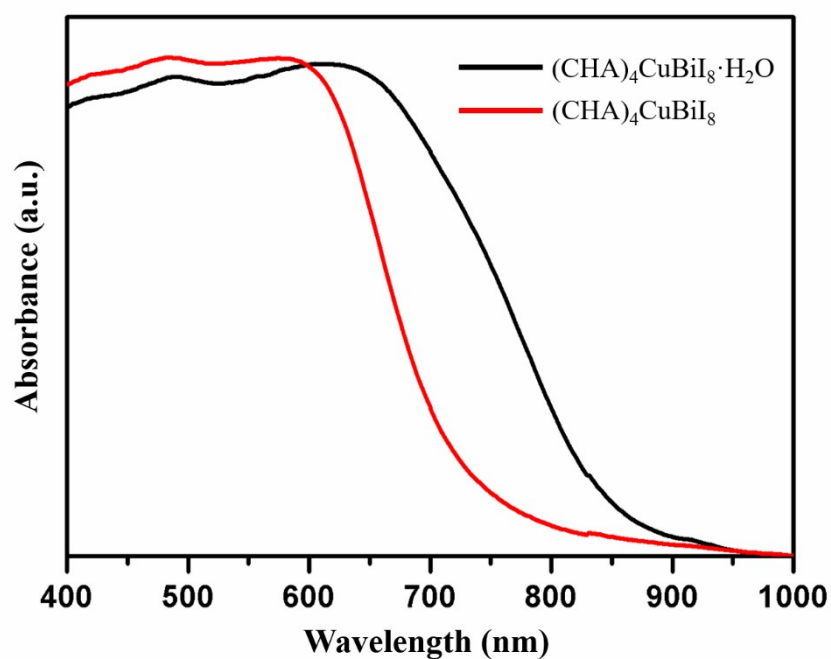

**Figure S5.** The UV-vis absorption spectra of (CHA)<sub>4</sub>CuBiI<sub>8</sub>·H<sub>2</sub>O and (CHA)<sub>4</sub>CuBiI<sub>8</sub> at room temperature.

**Table S1.** Phase transition temperature and cause of phase transition of  $(\text{CHA})_2\text{CdCl}_4$ ,  $(\text{CHA})_2\text{PbBr}_{4-4x}\text{I}_{4x}$  and  $(\text{CHA})_2\text{BiCl}_5$ .

|                                                 | Phase transition temperature                                      | Cause of phase transition               | Ref |
|-------------------------------------------------|-------------------------------------------------------------------|-----------------------------------------|-----|
| $(\text{CHA})_2\text{CdCl}_4$                   | 215 K, 367 K                                                      | disorder–order transition<br>of cations | 1   |
| $(\text{CHA})_2\text{PbBr}_{4-4x}\text{I}_{4x}$ | X=0, $T_c=363$ K<br>X=0.1125, $T_c=378$ K<br>X=0.175, $T_c=380$ K | disorder–order transition<br>of cations | 2   |
| $(\text{CHA})_2\text{BiCl}_5$                   | 325 K                                                             | disorder–order transition<br>of cations | 3   |

**Table S2.** Crystal data and structure refinements for  $(\text{CHA})_4\text{CuBiI}_8 \cdot \text{H}_2\text{O}$  at 150 K, and  $(\text{CHA})_4\text{CuBiI}_8$  at 400 K and 150 K.

|                                       | $(\text{CHA})_4\text{CuBiI}_8 \cdot \text{H}_2\text{O}$<br>at 150 K | $(\text{CHA})_4\text{CuBiI}_8$<br>at 400 K           | $(\text{CHA})_4\text{CuBiI}_8$<br>at 150 K                                 |
|---------------------------------------|---------------------------------------------------------------------|------------------------------------------------------|----------------------------------------------------------------------------|
| Empirical formula                     | $\text{C}_{24}\text{H}_{58}\text{BiCuI}_8\text{N}_4\text{O}$        | $\text{C}_{24}\text{H}_{56}\text{BiCuI}_8\text{N}_4$ | $\text{C}_{48}\text{H}_{112}\text{Bi}_2\text{Cu}_2\text{I}_{16}\text{N}_8$ |
| Formula weight                        | 1706.47                                                             | 1688.46                                              | 3376.92                                                                    |
| Crystal system                        | Monoclinic                                                          | Monoclinic                                           | Monoclinic                                                                 |
| Space group                           | $C2/c$                                                              | $P2_1/c$                                             | $Cc$                                                                       |
| $a$ (Å)                               | 32.3199(9)                                                          | 9.313(3)                                             | 18.7108(11)                                                                |
| $b$ (Å)                               | 8.5589(3)                                                           | 9.211(4)                                             | 17.4002(11)                                                                |
| $c$ (Å)                               | 19.6321(5)                                                          | 26.573(10)                                           | 26.3343(16)                                                                |
| $\alpha$ (°)                          | 90                                                                  | 90                                                   | 90                                                                         |
| $\beta$ (°)                           | 125.1470(10)                                                        | 91.149(6)                                            | 90.686(3)                                                                  |
| $\gamma$ (°)                          | 90                                                                  | 90                                                   | 90                                                                         |
| Volume(Å <sup>3</sup> )               | 4440.5(2)                                                           | 2279.0(15)                                           | 8573.1(9)                                                                  |
| $Z$                                   | 4                                                                   | 2                                                    | 4                                                                          |
| Radiation type                        | $\text{MoK}_\alpha$                                                 | $\text{MoK}_\alpha$                                  | $\text{MoK}_\alpha$                                                        |
| Absorption correction                 | Multi-scan                                                          | Multi-scan                                           | Multi-scan                                                                 |
| $d_{\text{calc}}$ /g cm <sup>-3</sup> | 2.553                                                               | 2.460                                                | 2.616                                                                      |
| $F(000)$                              | 3096                                                                | 1528                                                 | 6112                                                                       |
| GOF                                   | 1.053                                                               | 1.047                                                | 1.057                                                                      |
| $R_1[I > 2\sigma(I)]$                 | 0.0225                                                              | 0.1152                                               | 0.0724                                                                     |
| $wR_2[I > 2\sigma(I)]$                | 0.0585                                                              | 0.3673                                               | 0.1616                                                                     |

**Table S3.** Selected bond lengths [ $\text{\AA}$ ] and bond angles [ $^\circ$ ] for  $(\text{CHA})_4\text{CuBiI}_8 \cdot \text{H}_2\text{O}$  at 150 K.

| Temperature | bond lengths [ $\text{\AA}$ ] |                           | bond angles [ $^\circ$ ]                |           |
|-------------|-------------------------------|---------------------------|-----------------------------------------|-----------|
| 150 K       | Bi1—I1                        | 3.0587(2)                 | I1—Bi1—I1 <sup>i</sup>                  | 180.0     |
|             | Bi1—I1 <sup>i</sup>           | 3.0588(2)                 | I1—Bi1—I3 <sup>i</sup>                  | 88.137(6) |
|             | Bi1—I3 <sup>i</sup>           | 3.0721(2)                 | I1 <sup>i</sup> —Bi1—I3 <sup>i</sup>    | 91.862(6) |
|             | Bi1—I3                        | 3.0721(2)                 | I1—Bi1—I3                               | 91.862(6) |
|             | Bi1—I2 <sup>i</sup>           | 3.1059(2)                 | I1 <sup>i</sup> —Bi1—I3                 | 88.138(6) |
|             | Bi1—I2                        | 3.1059(2)                 | I3 <sup>i</sup> —Bi1—I3                 | 180.0     |
|             | I3—Cu1                        | 2.7401(13)                | I1—Bi1—I2 <sup>i</sup>                  | 89.908(6) |
|             | I4—Cu1 <sup>ii</sup>          | 2.4716 (12)               | I1 <sup>i</sup> —Bi1—I2 <sup>i</sup>    | 90.092(6) |
|             | I4—Cu1                        | 2.5824 (12)               | I3 <sup>i</sup> —Bi1—I2 <sup>i</sup>    | 87.367(6) |
|             |                               |                           | I3—Bi1—I2 <sup>i</sup>                  | 92.633(6) |
|             |                               |                           | I1—Bi1—I2                               | 90.093(6) |
|             |                               |                           | I1 <sup>i</sup> —Bi1—I2                 | 89.907(6) |
|             |                               |                           | I3 <sup>i</sup> —Bi1—I2                 | 92.632(6) |
|             |                               |                           | I3—Bi1—I2                               | 87.368(6) |
|             |                               |                           | I2 <sup>i</sup> —Bi1—I2                 | 180.0     |
|             |                               |                           | Cu1—I3—Bi1                              | 159.20(3) |
|             |                               |                           | Cu1 <sup>ii</sup> —I4—Cu1               | 32.10(7)  |
|             |                               |                           | Cu1 <sup>ii</sup> —Cu1—I4 <sup>ii</sup> | 78.31(9)  |
|             |                               |                           | Cu1 <sup>ii</sup> —Cu1—I4               | 69.59(9)  |
|             |                               |                           | I4 <sup>ii</sup> —Cu1—I4                | 142.97(6) |
|             |                               | Cu1 <sup>ii</sup> —Cu1—I3 | 130.87(4)                               |           |
|             |                               | I4 <sup>ii</sup> —Cu1—I3  | 104.28(4)                               |           |
|             |                               | I4—Cu1—I3                 | 110.49(4)                               |           |

Symmetry codes: (i)  $-x+1, -y+1, -z+1$ ; (ii)  $-x+1, y, -z+1/2$ .

**Table S4.** Selected bond lengths [ $\text{\AA}$ ] and bond angles [ $^\circ$ ] for  $(\text{CHA})_4\text{CuBiI}_8$  at 400 K.

| Temperature | bond lengths [ $\text{\AA}$ ] |          | bond angles [ $^\circ$ ]             |          |
|-------------|-------------------------------|----------|--------------------------------------|----------|
| 400 K       | Bi1—I2                        | 3.084(2) | I2—Bi1—I2 <sup>i</sup>               | 180.0    |
|             | Bi1—I2 <sup>i</sup>           | 3.084(2) | I2—Bi1—I3                            | 89.93(7) |
|             | Bi1—I3                        | 3.090(2) | I2 <sup>i</sup> —Bi1—I3              | 90.07(7) |
|             | Bi1—I3 <sup>i</sup>           | 3.090(2) | I2—Bi1—I3 <sup>i</sup>               | 90.07(7) |
|             | Bi1—I1 <sup>i</sup>           | 3.089(2) | I2 <sup>i</sup> —Bi1—I3 <sup>i</sup> | 89.93(7) |
|             | Bi1—I1                        | 3.090(2) | I3—Bi1—I3 <sup>i</sup>               | 180.0    |
|             | Cu1—I4 <sup>ii</sup>          | 2.403(3) | I2—Bi1—I1 <sup>i</sup>               | 87.49(7) |
|             | Cu1—I4                        | 2.403(3) | I2 <sup>i</sup> —Bi1—I1 <sup>i</sup> | 92.51(7) |
|             | Cu1—I3                        | 3.570(2) | I3—Bi1—I1 <sup>i</sup>               | 90.28(6) |
|             |                               |          | I3 <sup>i</sup> —Bi1—I1 <sup>i</sup> | 89.72(6) |
|             |                               |          | I2—Bi1—I1                            | 92.51(7) |

|                          |           |
|--------------------------|-----------|
| I2 <sup>i</sup> —Bi1—I1  | 87.49(7)  |
| I3—Bi1—I1                | 89.72(6)  |
| I3 <sup>i</sup> —Bi1—I1  | 90.28(6)  |
| I1 <sup>i</sup> —Bi1—I1  | 180.0     |
| I4 <sup>ii</sup> —Cu1—I4 | 180.0     |
| I4 <sup>ii</sup> —Cu1—I3 | 88.63(7)  |
| I4—Cu1—I3                | 91.37(7)  |
| Bi1—I3—Cu1               | 159.04(9) |

Symmetry codes: (i)  $-x+2, -y+1, -z+1$ ; (ii)  $-x+1, -y, -z+1$ .

**Table S5.** Selected bond lengths [Å] and bond angles [°] for (CHA)<sub>4</sub>CuBiI<sub>8</sub> at 150 K.

| Temperature | bond lengths [Å]        |            | bond angles [°] |           |
|-------------|-------------------------|------------|-----------------|-----------|
| 150 K       | Bi1—I7                  | 2.9961(14) | I7—Bi1—I6       | 89.97(4)  |
|             | Bi1—I6                  | 2.9979(14) | I7—Bi1—I5       | 90.45(4)  |
|             | Bi1—I5                  | 3.0797(15) | I6—Bi1—I5       | 88.64(4)  |
|             | Bi1—I4                  | 3.1035(16) | I7—Bi1—I4       | 90.83(4)  |
|             | Bi1—I3                  | 3.1465(14) | I6—Bi1—I4       | 92.98(4)  |
|             | Bi1—I8                  | 3.1601(14) | I5—Bi1—I4       | 177.93(5) |
|             | Bi2—I14                 | 3.0072(15) | I7—Bi1—I3       | 179.48(6) |
|             | Bi2—I16                 | 3.0414(14) | I6—Bi1—I3       | 90.13(4)  |
|             | Bi2—I13                 | 3.0877(14) | I5—Bi1—I3       | 89.04(4)  |
|             | Bi2—I11                 | 3.0907(14) | I4—Bi1—I3       | 89.67(4)  |
|             | Bi2—I12                 | 3.1018(17) | I7—Bi1—I8       | 91.03(4)  |
|             | Bi2—I15                 | 3.1410(15) | I6—Bi1—I8       | 177.99(5) |
|             | Cu1—I1                  | 2.438(8)   | I5—Bi1—I8       | 93.09(4)  |
|             | Cu1—I2                  | 2.605(8)   | I4—Bi1—I8       | 85.26(4)  |
|             | Cu1—I14 <sup>i</sup>    | 2.995(9)   | I3—Bi1—I8       | 88.89(4)  |
|             | Cu2—I10                 | 2.458(6)   | I14—Bi2—I16     | 91.40(4)  |
|             | Cu2—I9                  | 2.561(7)   | I14—Bi2—I13     | 87.16(4)  |
|             | Cu2—I16 <sup>i</sup>    | 2.971(9)   | I16—Bi2—I13     | 90.88(4)  |
|             | Cu2—I6 <sup>ii</sup>    | 2.998(8)   | I14—Bi2—I11     | 91.10(4)  |
|             | Cu1'—I1                 | 2.5829(12) | I16—Bi2—I11     | 177.25(5) |
|             | Cu1'—I2                 | 2.5837(12) | I13—Bi2—I11     | 90.36(4)  |
|             | Cu1'—I15 <sup>iii</sup> | 2.806(5)   | I14—Bi2—I12     | 93.54(4)  |
|             | Cu1'—I3                 | 2.840(5)   | I16—Bi2—I12     | 89.36(4)  |
|             | Cu2'—I10                | 2.555(5)   | I13—Bi2—I12     | 179.26(5) |
|             | Cu2'—I9                 | 2.5905(12) | I11—Bi2—I12     | 89.37(4)  |
|             | Cu2'—I8                 | 2.801(6)   | I14—Bi2—I15     | 178.20(5) |
|             | Cu2'—I11                | 2.972(8)   | I16—Bi2—I15     | 90.33(4)  |
|             | I6—Cu2 <sup>iv</sup>    | 2.998(8)   | I13—Bi2—I15     | 92.32(4)  |
|             | I14—Cu1 <sup>v</sup>    | 2.994(9)   | I11—Bi2—I15     | 87.17(4)  |
|             | I15—Cu1' <sup>vi</sup>  | 2.806(5)   | I12—Bi2—I15     | 86.98(4)  |
|             | I16—Cu2 <sup>v</sup>    | 2.971(9)   | Cu1'—Cu1—I1     | 78.3(3)   |



|                                        |            |
|----------------------------------------|------------|
| Cu1'—Cu1—I2                            | 72.6(3)    |
| I1—Cu1—I2                              | 150.53(16) |
| Cu1'—Cu1—I14 <sup>i</sup>              | 129.3(6)   |
| I1—Cu1—I14 <sup>i</sup>                | 101.6(3)   |
| I2—Cu1—I14 <sup>i</sup>                | 100.5(3)   |
| Cu2'—Cu2—I10                           | 76.5(3)    |
| Cu2'—Cu2—I9                            | 74.4(2)    |
| I10—Cu2—I9                             | 149.8(3)   |
| Cu2'—Cu2—I16 <sup>i</sup>              | 130.5(5)   |
| I10—Cu2—I16 <sup>i</sup>               | 105.3(3)   |
| I9—Cu2—I16 <sup>i</sup>                | 99.9(2)    |
| Cu2'—Cu2—I6 <sup>ii</sup>              | 131.8(5)   |
| I10—Cu2—I6 <sup>ii</sup>               | 96.4(3)    |
| I9—Cu2—I6 <sup>ii</sup>                | 96.8(2)    |
| I16 <sup>i</sup> —Cu2—I6 <sup>ii</sup> | 97.5(2)    |
| Cu1—Cu1'—I1                            | 67.6(3)    |
| Cu1—Cu1'—I2                            | 74.2(3)    |
| I1—Cu1'—I2                             | 141.53(13) |
| Cu1—Cu1'—I15 <sup>iii</sup>            | 130.2(5)   |
| I1—Cu1'—I15 <sup>iii</sup>             | 101.87(14) |
| I2—Cu1'—I15 <sup>iii</sup>             | 98.76(13)  |
| Cu1—Cu1'—I3                            | 124.0(5)   |
| I1—Cu1'—I3                             | 100.94(12) |
| I2—Cu1'—I3                             | 104.24(13) |
| I15 <sup>iii</sup> —Cu1'—I3            | 105.69(11) |
| Cu2—Cu2'—I10                           | 69.3(3)    |
| Cu2—Cu2'—I9                            | 72.2(3)    |
| I10—Cu2'—I9                            | 140.6(3)   |
| Cu2—Cu2'—I8                            | 123.9(5)   |
| I10—Cu2'—I8                            | 104.56(16) |
| I9—Cu2'—I8                             | 103.42(18) |
| Cu2—Cu2'—I11                           | 131.2(5)   |
| I10—Cu2'—I11                           | 97.83(17)  |
| I9—Cu2'—I11                            | 101.2(2)   |
| I8—Cu2'—I11                            | 104.8(2)   |
| Cu1—I1—Cu1'                            | 34.10(5)   |
| Cu1'—I2—Cu1                            | 33.11(6)   |
| Cu1'—I3—Bi1                            | 167.38(10) |
| Bi1—I6—Cu2 <sup>iv</sup>               | 155.74(15) |
| Cu2'—I8—Bi1                            | 147.36(15) |
| Cu2—I9—Cu2'                            | 33.35(5)   |
| Cu2—I10—Cu2'                           | 34.23(6)   |
| Cu2'—I11—Bi2                           | 163.34(13) |
| Cu1 <sup>v</sup> —I14—Bi2              | 151.02(16) |

|                            |            |
|----------------------------|------------|
| Cu1 <sup>vi</sup> —I15—Bi2 | 149.52(9)  |
| Cu2 <sup>v</sup> —I16—Bi2  | 161.35(16) |

Symmetry codes: (i)  $x+1/2, y+1/2, z$ ; (ii)  $x+1/2, y-1/2, z$ ; (iii)  $x, y+1, z$ ; (iv)  $x-1/2, y+1/2, z$ ; (v)  $x-1/2, y-1/2, z$ ; (vi)  $x, y-1, z$ .

**Table S6.**  $H_{\text{inside}}-I_{\text{outside}}$  surface area, mean  $d_i$  and mean  $d_e$  for  $(\text{CHA})_4\text{CuBi}_8\cdot\text{H}_2\text{O}$  and  $(\text{CHA})_4\text{CuBi}_8$  at different temperatures.

|                                                               | $H_{\text{inside}}-I_{\text{outside}}$ surface area (%) | mean $d_i$ | mean $d_e$ |
|---------------------------------------------------------------|---------------------------------------------------------|------------|------------|
| $(\text{CHA})_4\text{CuBi}_8\cdot\text{H}_2\text{O}$<br>150 K | 74.8                                                    | 2.2272     | 1.5887     |
| $(\text{CHA})_4\text{CuBi}_8$<br>400 K                        | 88.9                                                    | 2.3618     | 1.5789     |
| $(\text{CHA})_4\text{CuBi}_8$<br>150 K                        | 87.6                                                    | 2.276      | 1.5103     |

References:

1. W.-Q. Liao, H.-Y. Ye, D.-W. Fu, P.-F. Li, L.-Z. Chen and Y. Zhang, *Inorg. Chem.*, 2014, **53**, 11146-11151.
2. H.-Y. Ye, W.-Q. Liao, C.-L. Hu, Y. Zhang, Y.-M. You, J.-G. Mao, P.-F. Li and R.-G. Xiong, *Adv. Mater.*, 2016, **28**, 2579-2586.
3. Y. Wang, S. Han, X. Liu, Z. Wu, Z. Sun, D. Dey, Y. Li and J. Luo, *RSC Adv.*, 2020, **10**, 17492-17496.
